# Supplementary material
Source: PubMed Central journal article supplement (PMC4002449)
Supplement: cmi20118x1.pdf [file cmi20118x1.pdf]

**Supplemental Table 1 Comparison of white blood cell and neutrophil count between subcutaneous single-dose and continuous dosing administration of a CXCR4 antagonist, 4F-benzoyl-TE14011**

| <i>Time (h)</i> | <i>White blood cell (<math>\times 10^3/\mu\text{l}</math>)</i> |                          | <i>Neutrophil (<math>\times 10^3/\mu\text{l}</math>)</i> |                          |
|-----------------|----------------------------------------------------------------|--------------------------|----------------------------------------------------------|--------------------------|
|                 | <i>Single dose</i>                                             | <i>Continuous dosing</i> | <i>Single dose</i>                                       | <i>Continuous dosing</i> |
| 0               | 4.0 $\pm$ 0.5                                                  | 4.0 $\pm$ 0.6            | 1.2 $\pm$ 0.1                                            | 1.3 $\pm$ 0.2            |
| 1               | 6.8 $\pm$ 0.4                                                  | 4.4 $\pm$ 0.5            | 2.3 $\pm$ 0.2                                            | 1.4 $\pm$ 0.1            |
| 3               | 9.3 $\pm$ 0.4                                                  | 4.7 $\pm$ 0.7            | 3.0 $\pm$ 0.3                                            | 1.4 $\pm$ 0.1            |
| 6               | 14.6 $\pm$ 1.1                                                 | 5.0 $\pm$ 0.6            | 4.6 $\pm$ 0.3                                            | 1.5 $\pm$ 0.1            |
| 9               | 12.2 $\pm$ 0.5                                                 | 4.7 $\pm$ 0.4            | 3.7 $\pm$ 0.2                                            | 1.5 $\pm$ 0.1            |
| 24              | 6.4 $\pm$ 0.4                                                  | 4.7 $\pm$ 0.8            | 1.5 $\pm$ 0.1                                            | 1.3 $\pm$ 0.2            |

4F-benzoyl-TE14011 was subcutaneously administrated in single dose (120  $\mu\text{g}$ ) or by continuous dosing using an osmotic pump (120  $\mu\text{g}/\text{day}$ ). Values are expressed as mean $\pm$ s.e.m. ( $n=3$ ).
